# Predictors of Health Care Costs in Adults With Diabetes

TODD P. GILMER, PHD<sup>1</sup>  
 PATRICK J. O'CONNOR, MD, MPH<sup>2</sup>  
 WILLIAM A. RUSH, PHD<sup>2</sup>  
 A. LAUREN CRAIN, PHD<sup>2</sup>

ROBIN R. WHITEBIRD, PHD<sup>2</sup>  
 ANN M. HANSON, BA<sup>2</sup>  
 LEIF I. SOLBERG, MD<sup>2</sup>

**OBJECTIVE** — The purpose of this study was to assess the impact of baseline A1c, cardiovascular disease, and depression on subsequent health care costs among adults with diabetes.

**RESEARCH DESIGN AND METHODS** — A prospective analysis was performed of data from a patient survey and medical record review merged with 3 years of medical claims. Costs were estimated using detailed data on resource use and Medicare payment methodologies. Generalized linear models were used to analyze costs related to clinical predictors after adjusting for demographic and socioeconomic factors.

**RESULTS** — In multivariate analysis of 1,694 adults with diabetes, 3-year costs in those with coronary heart disease (CHD) and hypertension were over 300% of those with diabetes only (\$46,879 vs. \$14,233;  $P < 0.05$ ). Depression was associated with a 50% increase in costs (\$31,967 vs. \$21,609;  $P < 0.05$ ). Relative to those with a baseline A1c of 6%, those with an A1c of 10% had 3-year costs that were 11% higher (\$26,408 vs. \$23,873;  $P < 0.05$ ). Higher A1c predicted higher costs only for those with baseline A1c  $> 7.5\%$  ( $P = 0.015$ ).

**CONCLUSIONS** — In adults with diabetes, CHD, hypertension, and depression spectrum disorders more strongly predicted future costs than the A1c level. Concurrent with aggressive efforts to control glucose, greater efforts to prevent or control CHD, hypertension, and depression are necessary to control health care costs in adults with diabetes.

*Diabetes Care* 28:59–64, 2005

Adults with diabetes experience significantly higher health care costs than sex- and age-matched adults without diabetes (1–5). This increased use of resources is related to a broad range of factors including higher outpatient costs, higher pharmaceutical costs, higher rates of hospitalization, and longer hospital stays during admissions related to many diagnoses (6). Cardiovascular disease accounts for about 70% of deaths in adults with diabetes, and several studies show that cardiovascular disease is a ma-

jor driver of costs in diabetes patients (7–10).

A substantial body of research on diabetes management has focused on glycemic control. Large randomized controlled trials have shown that aggressive management of A1c reduces the risk of microvascular complications in patients with type 1 and type 2 diabetes (11,12). In earlier work, we examined medical charges related to A1c and found that after controlling for demographics and cardiovascular disease, charges rose by ~30% as A1c in-

creased from 6 to 10%. In the same study subjects, after controlling for A1c, sex, and age, those with heart disease and hypertension had charges over 400% of those with diabetes alone. At the time, we concluded that cardiovascular disease was a stronger predictor of resource use in adults with diabetes than was the level of glycemic control (8).

Our previous analysis was conducted using data from 1992 to 1996, in an era when glycemic control was generally worse than it is now. In recent years, A1c levels have improved with the increased availability of more effective pharmacologic agents including new insulins, metformin, and thiazolidinediones, with marked A1c improvement noted in some care settings (13–16). Similarly, more effective pharmacologic strategies have been developed and disseminated for the primary and secondary prevention of cardiovascular disease, and studies have shown that the use of statins (17,18), fibrates (19), ACE inhibitors (20), and more aggressive control of hypertension (21,22) reduce cardiovascular morbidity and mortality in those with diabetes. Data show that A1c levels tend to rise with duration of diabetes (23), and the prevalence of depressive symptoms appears to be increased among those with diabetes (24) due to several factors (25–27). This study provides an analysis of recent data and uses a more extensive set of predictive factors that may impact the relationship of baseline A1c on costs including duration of diabetes, depression, income, and education level. We hypothesized that higher levels of baseline A1c, longer duration of diabetes, and presence of cardiovascular disease and depression would be associated with increased costs. We had no expectations regarding socioeconomic factors.

## RESEARCH DESIGN AND METHODS

This prospective study was conducted at HealthPartners, a Minnesota health plan with over 600,000 members. Persons with diabetes were identified from administrative databases using data from calendar year 1999. A diagnosis of diabetes was assigned to indi-

From the <sup>1</sup>Department of Family and Preventive Medicine, University of California, San Diego, California; and the <sup>2</sup>HealthPartners Research Foundation, Bloomington, Minnesota.

Address correspondence and reprint requests to Todd P. Gilmer, PhD, Department of Family and Preventive Medicine University of California, San Diego, 9500 Gilman Dr., La Jolla, CA 92093-0622. E-mail: tgilmer@ucsd.edu.

Received for publication 1 July 2004 and accepted in revised form 6 October 2004.

**Abbreviations:** CHD, coronary heart disease; DRG, diagnostic related groups; RVU, relative value unit. A table elsewhere in this issue shows conventional and Système International (SI) units and conversion factors for many substances.

© 2005 by the American Diabetes Association.

The costs of publication of this article were defrayed in part by the payment of page charges. This article must therefore be hereby marked "advertisement" in accordance with 18 U.S.C. Section 1734 solely to indicate this fact.

viduals who had either one inpatient or two outpatient encounters with diabetes-specific diagnoses from ICD-9 (250.xx, 357.2, 362.01, 362.02, 366.41) or who filled a prescription for anti-hyperglycemic medications (insulin, sulfonylurea, biguanide, thiazolidinedione, meglitinide, other secretagogue, or  $\alpha$ -glucosidase inhibitor) in a 12-month period. Similarly, individuals were identified as having coronary heart disease (CHD) if they received at least one inpatient or two outpatient ICD-9 codes for CHD (410–414, 429.2, 428.0) or a relevant procedure code (CPT4 code between 33510 and 33545 or 36822 and ICD-9 codes between 36.0 and 36.29 or between 36.9 and 36.99) in a 12-month period. These identification methods have been previously validated. The diabetes identification method has estimated specificity of 0.99, sensitivity of 0.91, and positive predictive value of 0.94, and the CHD identification method has an estimated specificity of 0.99, sensitivity of 0.89, and positive predictive value of 0.79 (28).

Patients with diagnosed diabetes were randomly selected to receive a patient survey. A patient survey was sent to 4,780 adults with diabetes and returned by 2,832, for a response rate of 59.2%. The patient survey included over 140 questions examining multiple domains including history of chronic disease, health behaviors and self-management skills, and socioeconomic status. Of the 2,832 survey respondents who reported having diabetes, 2,117 (74.8%) gave written informed consent for a medical record review, which was completed for 2,077 (98.1%). We excluded 383 persons (18.4%) who did not have an A1c value recorded in the baseline period. Thus, the analysis sample included 1,694 persons with diabetes. Compared with those who were excluded, those in the analysis sample were equally likely to be female (47.0 vs. 46.1%;  $P = 0.7$ ) but were older on average (62.6 vs. 57.8 years;  $P < 0.001$ ) and were more likely to have CHD (24.0 vs. 19.9%;  $P = 0.003$ ).

Diabetes and CHD were classified based on automated medical record data as described above. Hypertension, dyslipidemia, and depression spectrum disorders were classified based on self-report from the patient survey. Patients were asked, "Have you ever been told by a health professional that you have (high blood pressure or hypertension/high

blood cholesterol/depression)?" Duration of diabetes was calculated using the answer to the question: "Approximately how old were you when you were first told you had diabetes?" Education and income were determined by self-report from the patient survey using standard survey items (29). We designated individuals who reported their highest educational attainment as less than high school as having a low education level. Individuals reporting household incomes as  $< \$25,000$  were designated as low income. Missing data from the survey-based measures were imputed using missing value multivariate regressions (30). A pharmacy coverage indicator was created from enrollment information to designate individuals with comprehensive pharmacy coverage under HealthPartners for the entire study period in which they were enrolled.

The dependent variable for this analysis was costs from the perspective of a health insurer. Claims and encounter data were obtained for study subjects for calendar years 1999–2002. Patients received care in 84 clinics within 18 medical groups that had contracts with HealthPartners to provide services to its members. Forty-three percent of study subjects were enrolled in a medical group with a fully capitated contract, 29% under a fee-for-service contract, and 28% under a contract that was partially capitated and partially fee-for-service. In order to avoid pricing bias resulting from use of fee-for-service claims versus encounter data (from capitated medical groups) and from varying fee schedules for fee-for-service claims, we determined to use a consistent method for pricing the service data at payment rates standard for Medicare.

Inpatient admissions were priced using diagnostic related groups (DRGs) and simulated outlier payments. Diagnostic and procedure data from the inpatient stay were combined with each patient's age and sex to calculate a DRG for the inpatient stay. DRGs were then priced at the national average Medicare rate for 2002. The DRG payment methodology allows for outlier payments for particularly expensive hospital stays. We simulated a DRG outlier payment by adding 60% of inpatient charges above the DRG charge threshold. Costs for 34 admissions (0.6%) were adjusted for outlier payments.

Costs for physician services in the hospital, outpatient hospital, and outpa-

tient clinic settings as well as costs for all other outpatient services such as nursing services, laboratory services, and dialysis were priced using relative value units (RVUs). Each service was assigned an RVU based on the procedure code recorded. RVUs were then priced at \$36.20, the national average Medicare allowable amount per RVU in 2002. We used analyses provided by the Department of Health and Human Services in a report to the President to determine the amount paid, on average, by large health plans aggressively negotiating drug prices for pharmaceuticals and supplies, which we estimate to be 68% of the average wholesale price (31). Stays at skilled nursing facilities were priced at \$320 per day, the mean per diem payment during the study period.

Total costs were calculated as the sum of costs from claims or encounters generated from the day of the first A1c measurement until the first of the date of disenrollment, death, or the study end date, which was 31 December 2002. Sixty-five individuals (3.3%) died during the study period, and 1,368 (81%) remained enrolled throughout the study period. Three-year cost was calculated as total cost divided by the number of days enrolled from the first A1c measurement until disenrollment, death, or the end of the study multiplied by 1,095.75 ( $3 \times 365.25$ ).

Generalized linear regression was used to estimate the relationship between 3-year costs and baseline A1c level, CHD, hypertension, dyslipidemia, and depression while controlling for demographics (age and sex), duration of diabetes, pharmacy coverage, income, and education (8). A1c was analyzed as two covariates: one for A1c levels  $> 7.5\%$  and another for A1c levels  $< 7.5\%$ . Costs were specified as having a  $\gamma$  distribution, and the link function was logistic. Thus, the estimated regression coefficients are on the log scale, and their direction and magnitude provide an indication of their effect: positive (negative) values indicate increased (decreased) costs, with the cost multiplier being approximately the exponential of the regression coefficient. Observations were weighted by each individual's duration in the study. Standardized estimates of costs by the level of baseline A1c were calculated by estimating the average cost across all individuals as if they had that level of baseline A1c (baseline A1c was used for

**Table 1—Study sample characteristics (n = 1,694)**

| Variable                       |                 |
|--------------------------------|-----------------|
| Demographic                    |                 |
| Female sex                     | 796 (47.0)      |
| Age (years)                    | 62.6 ± 12.8     |
| A1c                            | 7.5 ± 1.5       |
| Duration of diabetes           | 12.0 ± 12.7     |
| Comorbid chronic disease       |                 |
| CHD                            | 407 (24.0)      |
| Hypertension                   | 1,111 (65.6)    |
| Lipids                         | 1,052 (62.1)    |
| Depression                     | 413 (24.4)      |
| Socioeconomic                  |                 |
| Low income                     | 325 (19.2)      |
| Low education                  | 115 (6.8)       |
| Enrollment                     |                 |
| Years enrolled                 | 2.6 ± 0.4       |
| Pharmacy coverage              | 1,326 (78.3)    |
| Health care costs              |                 |
| 3-year costs                   | 23,948 ± 31,003 |
| 3-year costs (25th percentile) | 7,577           |
| 3-year costs (50th percentile) | 14,535          |
| 3-year costs (75th percentile) | 30,033          |

Data are mean, means ± SD, or n (%).

the analysis regardless of subsequent A1c values). Costs related to cardiovascular disease and depression were calculated similarly. Costs by A1c stratified by cardiovascular disease and depression were calculated as the average predicted cost across people with the specific condition standardized to the particular A1c value.

**RESULTS**— Population characteristics are summarized in Table 1. The study sample was 47% female with a mean age of 63 years. Mean A1c was 7.5%, and mean duration of diabetes was 12 years. There were high rates of cardiovascular disease: 24% were identified as having CHD and 66% reported having hyperten-

sion. The rate of reporting dyslipidemia was 62%, while 24% self-reported depressive symptoms, 19% were in low-income households, and 7% had less than a high school education. Mean enrollment from the first A1c until the end of observation was 2.6 years, and 78% had pharmacy coverage throughout the study period. Mean 3-year health care cost was \$23,948 (SD \$31,003). Median cost was \$14,535 (interquartile range \$7,577–\$30,033).

Table 2 shows results from the regression analysis. The main variable of interest, A1c level, was significantly associated with cost when A1c was >7.5% ( $P = 0.015$ ) but insignificant for A1c values <7.5% (the reference group, A1c = 7.5%, had both A1c covariates set to zero). CHD ( $P < 0.001$ ), hypertension ( $P < 0.001$ ), and depression ( $P < 0.001$ ) were also associated with increased cost. Dyslipidemia and duration of diabetes were not significantly associated with cost. Those with pharmacy coverage under HealthPartners cost more than those without coverage, although there were not significant differences in nonpharmacy costs ( $P = 0.16$ ).

Costs by level of A1c as well as presence of CHD and hypertension are shown in Table 3. Higher baseline A1c levels are associated with greater costs among persons with higher initial levels of A1c. Those with CHD, hypertension, and depressive symptoms also had greater costs.

**Table 2—Multivariate regression analysis of 3-year cost (n = 1,694)**

| Variable                                    | Coefficient | SE     | Z-stat | P     | 95% CI             |
|---------------------------------------------|-------------|--------|--------|-------|--------------------|
| Female                                      | 0.0802      | 0.0900 | 0.89   | 0.373 | −0.0963 to 0.2567  |
| Age 62 years                                | 0.0174      | 0.0031 | 5.57   | 0.000 | 0.0113–0.0235      |
| (Age 62 years) $\wedge^2$                   | −0.0003     | 0.0001 | −2.22  | 0.026 | −0.0006 to 0.0000  |
| Female $\times$ (age 62 years)              | −0.0097     | 0.0041 | −2.37  | 0.018 | −0.0177 to −0.0017 |
| [Female $\times$ (age 62 years)] $\wedge^2$ | 0.0003      | 0.0002 | 1.29   | 0.196 | −0.0002 to 0.0008  |
| A1c 7.5% and A1c >7.5%                      | 0.0534      | 0.0220 | 2.43   | 0.015 | 0.0103–0.0966      |
| A1c 7.5% and A1c <7.5%                      | −0.0218     | 0.0431 | −0.51  | 0.613 | −0.1063 to 0.0627  |
| Duration of diabetes (12 years)             | 0.0019      | 0.0027 | 0.71   | 0.478 | −0.0034 to 0.0072  |
| CHD                                         | 0.7639      | 0.0646 | 11.83  | 0.000 | 0.6374–0.8905      |
| Hypertension                                | 0.2233      | 0.0471 | 4.74   | 0.000 | 0.1310–0.3156      |
| Lipids                                      | 0.0951      | 0.0597 | 1.59   | 0.111 | −0.0219 to 0.2122  |
| Depression                                  | 0.3043      | 0.0709 | 4.29   | 0.000 | 0.1654–0.4432      |
| Pharmacy coverage                           | 0.3995      | 0.0714 | 5.59   | 0.000 | 0.2594–0.5395      |
| Low income                                  | 0.1196      | 0.0699 | 1.71   | 0.087 | −0.0175 to 0.2566  |
| Low education                               | −0.0265     | 0.0917 | −0.29  | 0.773 | −0.2062 to 0.1532  |
| Constant                                    | 9.1013      | 0.0985 | 92.37  | 0.000 | 8.9081–9.2944      |

The dependent variable is an estimate of 3 years of health care costs. The generalized linear regression uses a  $\gamma$  distribution with a log-link function and a covariance matrix that is robust to heteroscedasticity and allows for clustering of variance by primary care clinic. Observations are weighted by length of enrollment.

Table 3—Standardized cost differentials for 1% changes in A1c for 1,694 adults with diabetes over a 3-year period

| Patient classification                         | Changes in A1c levels |               |           |                | Overall**†     |
|------------------------------------------------|-----------------------|---------------|-----------|----------------|----------------|
|                                                | 10 to 9%*             | 9 to 8%*      | 8 to 7%   | 7 to 6%        |                |
| Diabetes with heart disease and hypertension   | 2,675 ± 1,164         | 2,536 ± 1,048 | 726 ± 953 | −1,001 ± 2,000 | 46,879 ± 2,388 |
| Diabetes with heart disease                    | 2,078 ± 900           | 1,970 ± 811   | 564 ± 745 | −778 ± 1,547   | 36,577 ± 2,410 |
| Diabetes with hypertension                     | 1,130 ± 498           | 1,071 ± 449   | 306 ± 400 | −423 ± 849     | 19,805 ± 859   |
| Diabetes without heart disease or hypertension | 805 ± 353             | 763 ± 318     | 218 ± 287 | −301 ± 603     | 14,233 ± 548   |
| Diabetes with depression                       | 1,818 ± 793           | 1,723 ± 714   | 493 ± 643 | −680 ± 1,365   | 31,967 ± 1,961 |
| Diabetes without depression                    | 1,231 ± 539           | 1,167 ± 485   | 334 ± 439 | −461 ± 921     | 21,609 ± 641   |
| Overall                                        | 1,374 ± 599           | 1,303 ± 539   | 373 ± 488 | −514 ± 1,029   |                |

Data are means ± SE. \* $P < 0.05$ . †For statistical comparison, patients with heart disease and/or hypertension are compared with patients without heart disease or hypertension; patients with depression are compared with patients without depression.

Overall, the cost differential between those with A1cs of 6 and 10% was \$2,536 (\$23,873 vs. \$26,408;  $P < 0.05$ ). This differential was greatest for those with diabetes, hypertension, and CHD (\$4,935) and least for those without hypertension or CHD (\$1,486). Total costs were greater for individuals with CHD and hypertension (\$46,897) compared with those without hypertension or CHD (\$14,233) ( $P < 0.05$ ). Individuals reporting depression cost \$10,358 more than those without depression (\$31,967 vs. \$21,609;  $P < 0.05$ ).

**CONCLUSIONS**— These results indicate that CHD, hypertension, depression, and A1c levels all are significant independent predictors of health care costs in adults with diabetes after controlling for age, sex, duration of diabetes, educational level, and income. This study provides confirmation and valuable extension to previous work on clinical predictors of costs in adults with diabetes (1,3,6,8,32,33).

Congruent with previous findings, A1c continues to be a significant predictor of costs, although cardiovascular disease continues to be an even stronger predictor. In previous work, those with diabetes plus CHD and hypertension had costs 400% above those with diabetes alone. The somewhat smaller effect of cardiovascular disease in this study compared with our previous study may have resulted from our method of estimating costs (rather than charges) or could be related to improved control of A1c and major cardiovascular risk factors compared with the early 1990s. For example, mean A1c values have declined from 8.3% in our

previous study to 7.5% in this study. Studies have also documented increased rates of aspirin use and improved blood pressure and lipid control over this period of time in this study population (14). Specifically, aspirin use increased from about 30% in 1995 to about 60% in 2001, while mean LDL in those with diabetes fell from about 134 mg/dl in 1995 to 106 mg/dl in 2001. Trends toward better blood pressure control have also been observed, with a drop in mean systolic blood pressure of ~1 mm/year from 1999 to 2002 in the study population (34). While A1c level remains a significant predictor of future total costs, the cost differential related to level of A1c was less dramatic than what was noted in our previous study. Moreover, when A1c was <7.5%, it was not a significant predictor of future costs. This last observation is especially interesting in light of suggestions from the American Association of Clinical Endocrinologists that an A1c <6.5% may be appropriate for some patients (35).

A number of limitations must be considered in interpreting these data. First, the generalizability of our results is limited by the geographic and demographic characteristics of the study population. This limitation is mainly related to ethnicity: HealthPartners members (and Minnesota residents) are less likely to be Latino, African American, or Asian, compared with a nationally representative population of patients with diabetes. Second, there may be unmeasured variables that are related to both clinical predictors and costs. However, this study is stronger in this regard than most previous work on the topic because we measured and controlled for demographic and socioeco-

nomic factors as well as duration of diabetes and several important chronic conditions. Finally, the results are interpretable only at the level of groups of patients. For an individual patient, clinical care should be customized to maximize benefits with consideration of factors such as age, presence of cardiovascular disease, physiological response, readiness to change, and availability of pharmacy benefits (36,37).

While this study demonstrates that CHD, hypertension, depression, and A1c level are predictors of future costs in adults with diabetes, these data do not prove that their treatment will reduce costs. Other studies address the cost-effectiveness of intensive management of hypertension, dyslipidemia, and hyperglycemia in adults with diabetes. Analyses by the Centers for Disease Control and Prevention suggest that intensive management of glycemic control and dyslipidemia is generally less cost-effective than intensive hypertension control, which is cost-saving (38). Improved A1c, blood pressure, and lipids are consistently associated with better clinical outcomes in multiple clinical trials (17,39,40). Although clinical trial data suggest that aggressive management of hypertension and dyslipidemia significantly reduces major cardiovascular events (18,20,41,42), clinical trials have not yet shown a reduction in cardiovascular events from aggressive management of A1c (12). Clinical trials also suggest that resources devoted to more intensive A1c control (e.g., a move in A1c from 8 to <7%) return less on the investment than resources devoted to more intensive blood pressure control (a drop of 10



mmHg from 156 to 146 mmHg) (43) or more aggressive lipid control (44). In an observational study, only those with A1c >10% who reduced A1c substantially had lower subsequent costs relative to those who did not improve, while changes in A1c level for the large majority of the diabetes population did not affect their subsequent costs (32).

Until recently, most health plans and medical groups that attempt to improve diabetes care have focused primarily on improving A1c (45). This strategy makes clinical and economic sense when median A1c is high (A1c >8%). However, once median A1c improves to <8%, considerable evidence suggests that other factors (primary and secondary prevention of CHD, control of blood pressure, control of lipids, smoking cessation) may provide more clinical benefits at less cost on a population basis (36,46). The significance of these data and the need for greater focus on CHD prevention and control have received insufficient attention.

Despite the limitations of this study, the results are interesting and valuable in that they confirm the importance of A1c as a predictor of costs while placing this observation in a broader perspective. Although A1c remains an important clinical predictor of costs, several other clinical predictors including CHD, hypertension, and depressive symptoms are equal or more important predictors of cost. While continuing to aggressively control A1c, clinicians should place greater emphasis on prevention or control of CHD, hypertension, and depressive symptoms.

**Acknowledgments**—This work was supported by the Agency for Healthcare Research and Quality through Grant RO1 HS 09946 to HealthPartners Research Foundation.

Presented at the 64th Scientific Sessions of the American Diabetes Association, Orlando, Florida, 6 June 2004.

Author contributions: study and concept design: T.P.G. and P.J.O.C.; acquisition of data: T.P.G., P.J.O.C., W.A.R., A.L.C., R.R.W., A.M.H., and L.I.S.; analysis and interpretation of data: T.P.G. and P.J.O.C.; drafting of the manuscript: T.P.G. and P.J.O.C.; critical revision of the manuscript for important intellectual content: T.P.G., P.J.O.C., W.A.R., A.L.C., R.R.W., A.M.H., and L.I.S.; statistical expertise: T.P.G. and A.L.C.; obtained funding: P.J.O.C.; administrative, technical, or material support: T.P.G., P.J.O.C., W.A.R., A.L.C., R.R.W., A.M.H., and L.I.S.; study supervision: T.P.G. and P.J.O.C.

## References

- Selby J, Grumbach K, Quesenberry CJ, Schmittiel J, Truman A: Differences in resource use and costs of primary care in a large HMO according to physician specialty. *Health Serv Res* 34:503–518, 1999
- Selby JV, Ray GT, Zhang D, Colby CJ: Excess costs of medical care for patients with diabetes in a managed care population. *Diabetes Care* 20:1396–1402, 1997
- Brown JB, Nichols GA, Glauber HS, Bakst AW: Type 2 diabetes: incremental medical care costs during the first 8 years after diagnosis. *Diabetes Care* 22:1116–1124, 1999
- Browne GB, Arpin K, Corey P, Fitch M, Gafni A: Individual correlates of health service utilization and the cost of poor adjustment to chronic illness. *Med Care* 28:43–58, 1990
- Sidorov J, Shull R, Tomcavage J, Girolami S, Lawton N, Harris R: Does diabetes disease management save money and improve outcomes? A report of simultaneous short-term savings and quality improvement associated with a health maintenance organization-sponsored disease management program among patients fulfilling health employer data and information set criteria. *Diabetes Care* 25:684–689, 2002
- Fishman P, Korff MV, Hecht J: Chronic care costs in managed care. *Health Aff (Millwood)* 16:239–247, 1997
- Haffner SM, Lehto S, Ronnema T, Pyorala K, Laakso M: Mortality from coronary heart disease in subjects with type 2 diabetes and in nondiabetic subjects with and without prior myocardial infarction. *N Engl J Med* 339:229–234, 1998
- Gilmer TP, O'Connor PJ, Manning WG, Rush WA: The cost to health plans of poor glycemic control. *Diabetes Care* 20:1847–1853, 1997
- O'Connor P, Crabtree B, Nakamura R, Kelley D: Hospitalization experience of Navajo subjects with type II diabetes and matched controls: an historical cohort study. *J Clin Epidemiol* 43:881–890, 1990
- Saydah SH, Fradkin J, Cowie CC: Poor control of risk factors for vascular disease among adults with previously diagnosed diabetes. *JAMA* 291:335–342, 2004
- The Diabetes Control and Complications Trial Research Group: The effect of intensive treatment of diabetes on the development and progression of long-term complications in insulin-dependent diabetes mellitus. *N Engl J Med* 329:977–986, 1993
- UK Prospective Diabetes Study (UKPDS) Group: Intensive blood-glucose control with sulphonylureas or insulin compared with conventional treatment and risk of complications in patients with type 2 diabetes (UKPDS 33). *Lancet* 352:837–853, 1998
- Nyman MA, Murphy ME, Schryver PG, Naessens JM, Smith SA: Improving performance in diabetes care: a multicomponent intervention. *Eff Clin Pract* 3:205–212, 2000
- Sperl-Hillen J, O'Connor PJ, Carlson RR, Lawson TB, Halstenson C, Crowson T, Wuorenma J: Improving diabetes care in a large health care system: an enhanced primary care approach. *Jt Comm J Qual Improv* 26:615–622, 2000
- Sutherland JE, Hoehns JD, O'Donnell B, Wiblin RT: Diabetes management quality improvement in a family practice residency program. *J Am Board Fam Pract* 14:243–251, 2001
- Sidorov J, Gabbay R, Harris R, Shull RD, Girolami S, Tomcavage J, Starkey R, Hughes R: Disease management for diabetes mellitus: impact on Hemoglobin A1c. *Am J Manag Care* 6:1217–1226, 2000
- Pyorala K, Pedersen TR, Kjekshus J, Faergeman O, Olsson AG, Thorgeirsson G: Cholesterol lowering with simvastatin improves prognosis of diabetic patients with coronary heart disease: a subgroup analysis of the Scandinavian Simvastatin Survival Study (4S). *Diabetes Care* 20:614–620, 1997
- Heart Protection Study Collaborative Group: MRC/BHF Heart Protection Study of cholesterol lowering with simvastatin in 20,536 high-risk individuals: a randomised placebo-controlled trial. *Lancet* 360:7–22, 2002
- Robins SJ, Collins D, Wittes JT, Papademetriou V, Deedwania PC, Schaefer EJ, McNamara JR, Kashyap ML, Hershey JM, Wexler LF, Rubins HB: Relation of gemfibrozil treatment and lipid levels with major coronary events: VA-HIT: a randomized controlled trial. *JAMA* 285:1585–1591, 2001
- Heart Outcomes Prevention Evaluation Study Investigators: Effects of ramipril on cardiovascular and microvascular outcomes in people with diabetes mellitus: results of the HOPE study and MICRO-HOPE substudy. *Lancet* 355:253–259, 2000
- Hansson L, Zanchetti A, Carruthers SG, Dahlöf B, Elmfeldt D, Julius S, Menard J, Rahn KH, Wedel H, Westerling S: Effects of intensive blood-pressure lowering and low-dose aspirin in patients with hypertension: principal results of the Hypertension Optimal Treatment (HOT) randomised trial. HOT Study Group. *Lancet* 351:1755–1762, 1998
- Schrier R, Estacio R, Jeffers B: Appropriate blood pressure control in NIDDM (ABCD Trial). *Diabetologia* 39:646–654, 1996
- Shorr RI, Franse LV, Resnick HE, Di Bari

- M, Johnson KC, Pahor M: Glycemic control of older adults with type 2 diabetes: findings from the Third National Health and Nutrition Examination Survey, 1988–1994. *J Am Geriatr Soc* 48:264–267, 2000
24. Lustman PJ, Anderson RJ, Freedland KE, de Groot M, Carney RM, Clouse RE: Depression and poor glycemic control: a meta-analytic review of the literature. *Diabetes Care* 23:934–942, 2000
25. Anderson RJ, Freedland KE, Clouse RE, Lustman PJ: The prevalence of comorbid depression in adults with diabetes: a meta-analysis. *Diabetes Care* 24:1069–1078, 2001
26. Bruce DG, Casey GP, Grange V, Clarnette RC, Almeida OP, Foster JK, Ives FJ, Davis TM: Cognitive impairment, physical disability and depressive symptoms in older diabetic patients: the Fremantle Cognition in Diabetes Study. *Diabetes Res Clin Pract* 61:59–67, 2003
27. Musselman DL, Betan E, Larsen H, Phillips LS: Relationship of depression to diabetes types 1 and 2: epidemiology, biology, and treatment. *Biol Psychiatry* 54:317–329, 2003
28. O'Connor P, Rush W, Pronk N, Cherney L: Identifying diabetes mellitus or heart disease among health maintenance organization members: sensitivity, specificity, predictive value and cost of survey and database methods. *Am J Manag Care* 4:335–342, 1998
29. Stein AD, Lederman RI, Shea S: The Behavioral Risk Factor Surveillance System questionnaire: its reliability in a statewide sample. *Am J Public Health* 83:1768–1772, 1993
30. Little RJA and Rubin DB: *Statistical Analysis with Missing Data*. New York, Wiley, 1987
31. Report to the President: prescription drug coverage, spending, utilization, and prices [article online], 2000. Department of Health and Human Services. Available from <http://www.aspe.hhs.gov/health/reports/drugstudy/index.htm>. Accessed 12 November 2004
32. Wagner EH, Sandhu N, Newton KM, McCulloch DK, Ramsey SD, Grothaus LC: Effect of improved glycemic control on health care costs and utilization. *JAMA* 285:182–189, 2001
33. Brandle M, Zhou H, Smith B, Marriott D, Burke R, Tabaei B, Brown M, Herman W: The direct medical cost of type 2 diabetes. *Diabetes Care* 26:2300–2304, 2003
34. O'Connor PJ, Solberg LI, Whitebird RR, Crain AL, Christianson JC, Rush WA, Amundson G, Asche SE: The impact of clinic and medical group characteristics on diabetes care outcomes in primary care clinics (Abstract). *Diabetes* 53 (Suppl. 2): A288, 2004
35. Feld S: Introduction. *Endocr Pract* 8 (Suppl. 1):40–82, 2002
36. Institute for Clinical Systems Improvement: *Diabetes Mellitus (Type 2) Care Guideline for Patients and Families*. Bloomington, MN, ICSI, 2003
37. American Diabetes Association: Clinical practice recommendations 2003. *Diabetes Care* 26 (Suppl. 1):S1–S156, 2003
38. The CDC Diabetes Cost-effectiveness Group: Cost-effectiveness of intensive glycemic control, intensified hypertension control, and serum cholesterol level reduction for type 2 diabetes. *JAMA* 287: 2542–2551, 2002
39. UK Prospective Diabetes Study Group: Efficacy of atenolol and captopril in reducing risk of macrovascular and microvascular complications in type 2 diabetes: UKPDS 39. *BMJ* 317:713–720, 1998
40. UK Prospective Diabetes Study (UKPDS) Group: Effect of intensive blood-glucose control with metformin on complications in overweight patients with type 2 diabetes (UKPDS 34). *Lancet* 352:854–865, 1998
41. Haffner SM: The Scandinavian Simvastatin Survival Study (4S) subgroup analysis of diabetic subjects: implications for the prevention of coronary heart disease. *Diabetes Care* 20:469–471, 1997
42. Hansson L, Lindholm LH, Ekblom T, Dahlöf B, Lanke J, Schersten B, Wester PO, Hedner T, de Faire U: Randomised trial of old and new antihypertensive drugs in elderly patients: cardiovascular mortality and morbidity the Swedish Trial in Old Patients with Hypertension-2 study. *Lancet* 354:1751–1756, 1999
43. UK Prospective Diabetes Study Group: Cost effectiveness analysis of improved blood pressure control in hypertensive patients with type 2 diabetes: UKPDS 40. *BMJ* 317:720–726, 1998
44. Herman WH, Alexander CM, Cook JR, Boccuzzi SJ, Musliner TA, Pedersen TR, Kjekshus J, Pyorala K: Effect of simvastatin treatment on cardiovascular resource utilization in impaired fasting glucose and diabetes: findings from the Scandinavian Simvastatin Survival Study. *Diabetes Care* 22:1771–1778, 1999
45. O'Connor PJ, Sperl-Hillen JM, Pronk NP, Murray T: Primary care clinic-based chronic disease care. *Dis Manag Health Outcomes* 9:691–698, 2001
46. Johnson PE, Veazie PJ, Kochevar L, O'Connor PJ, Potthoff SJ, Verma D, Dutta P: Understanding variation in chronic disease outcomes. *Health Care Manag Sci* 5:175–189, 2002
